# Supplementary material for: Estimate of the vibrational contribution to the entropy change associated with the spin transition in the d4systems [MnIII(pyrol)3tren] and [CrII(depe)2I2]
Source: Royal Society of Chemistry journal article supplement (doi:10.1039/b616258d), 2007-01-01
Supplement: b616258d_esi_1.pdf [file b616258d_esi_1.pdf]

The calculated vibrations of high-spin and low-spin isomer of [Mn(III)(pyrrol)3tren]

|    | low-sj | high-ε |                                                                                                          |
|----|--------|--------|----------------------------------------------------------------------------------------------------------|
| 1  | 45     | 37     |                                                                                                          |
| 2  | 49     | 41     |                                                                                                          |
| 3  | 56     | 50     |                                                                                                          |
| 4  | 86     | 77     |                                                                                                          |
| 5  | 93     | 80     |                                                                                                          |
| 6  | 101    | 90     | pyrrole libration (flipping and around Mn_N bond,<br>twist of N(CH2)3 "cap" around pseudo C3 axis        |
| 7  | 120    | 114    |                                                                                                          |
| 8  | 129    | 121    |                                                                                                          |
| 9  | 130    | 128    |                                                                                                          |
| 10 | 166    | 142    |                                                                                                          |
| 11 | 189    | 150    |                                                                                                          |
| 12 | 196    | 157    | pyrrole libration with some Mn-Npyrr stretching, and<br>N-Mn-N bending, N(CH2)3 "cap" twist, CH2 rocking |
| 13 | 200    | 168    |                                                                                                          |
| 14 | 215    | 178    |                                                                                                          |
| 15 | 218    | 203    |                                                                                                          |
| 16 | 237    | 215    |                                                                                                          |
| 17 | 247    | 218    |                                                                                                          |
| 18 | 258    | 234    |                                                                                                          |
| 19 | 287    | 263    |                                                                                                          |
| 20 | 307    | 274    |                                                                                                          |
| 21 | 312    | 288    |                                                                                                          |
| 22 | 357    | 305    | Mn-N stretching and bending, combined with CH2 rocking<br>out-of-plane C-H imine vibrations,             |
| 23 | 362    | 340    |                                                                                                          |
| 24 | 372    | 348    |                                                                                                          |
| 25 | 377    | 360    |                                                                                                          |
| 26 | 400    | 378    |                                                                                                          |
| 27 | 402    | 394    |                                                                                                          |
| 28 | 426    | 405    |                                                                                                          |
| 29 | 432    | 408    |                                                                                                          |
| 30 | 436    | 418    |                                                                                                          |
| 31 | 441    | 431    |                                                                                                          |
| 32 | 463    | 439    |                                                                                                          |
| 33 | 469    | 448    | pronounced Mn-N stretching<br>combined with CH2 rocking and C-H methine out-of-plane                     |
| 34 | 490    | 463    |                                                                                                          |
| 35 | 496    | 478    |                                                                                                          |
| 36 | 499    | 490    |                                                                                                          |
| 37 | 564    | 554    | imine C-H out-of-plane, NCH2 rocking, some N-Mn-N bending                                                |
| 38 | 571    | 559    |                                                                                                          |
| 39 | 572    | 570    |                                                                                                          |
| 40 | 611    | 609    |                                                                                                          |
| 41 | 612    | 612    | pyrrole puckering                                                                                        |
| 42 | 615    | 615    |                                                                                                          |
| 43 | 696    | 691    |                                                                                                          |
| 44 | 698    | 692    |                                                                                                          |
| 45 | 700    | 696    |                                                                                                          |
| 46 | 715    | 715    | Namine-C stretching                                                                                      |
| 47 | 777    | 786    |                                                                                                          |
| 48 | 791    | 789    |                                                                                                          |
| 49 | 799    | 798    | pyrrole C-H out-of-plane                                                                                 |
| 50 | 800    | 802    |                                                                                                          |
| 51 | 802    | 804    |                                                                                                          |
| 52 | 803    | 807    |                                                                                                          |
| 53 | 870    | 865    |                                                                                                          |
| 54 | 873    | 874    | pyrrole C-H out-of-plane with some CH2 rocking                                                           |

|     |      |      |                                                     |
|-----|------|------|-----------------------------------------------------|
| 55  | 875  | 875  |                                                     |
| 56  | 875  | 876  |                                                     |
| 57  | 880  | 883  |                                                     |
| 58  | 885  | 887  |                                                     |
| 59  | 898  | 897  | pyrrole stretching, C-H out-of-plane                |
| 60  | 901  | 898  |                                                     |
| 61  | 901  | 899  |                                                     |
| 62  | 911  | 912  | ethyl C-C stretching                                |
| 63  | 912  | 916  |                                                     |
| 64  | 932  | 934  |                                                     |
| 65  | 936  | 936  | C-H pyrrole out-of-plane, pyrrole ring deformation, |
| 66  | 937  | 940  | Some Mn-N stretching                                |
| 67  | 976  | 973  |                                                     |
| 68  | 984  | 984  |                                                     |
| 69  | 988  | 991  |                                                     |
| 70  | 995  | 994  | C-H pyrrole in-plane                                |
| 71  | 996  | 997  |                                                     |
| 72  | 1001 | 999  |                                                     |
| 73  | 1010 | 1012 |                                                     |
| 74  | 1056 | 1061 |                                                     |
| 75  | 1065 | 1062 | C-H pyrrole in-plane and CH2 wagging,               |
| 76  | 1067 | 1065 | some Mn-N stretching                                |
| 77  | 1068 | 1067 |                                                     |
| 78  | 1072 | 1068 |                                                     |
| 79  | 1072 | 1069 |                                                     |
| 80  | 1095 | 1086 |                                                     |
| 81  | 1096 | 1094 | pyrrole ring breathing, C-H in-plane, CH2 wagging,  |
| 82  | 1098 | 1096 | Mn-N stretching                                     |
| 83  | 1099 | 1099 |                                                     |
| 84  | 1101 | 1106 |                                                     |
| 85  | 1106 | 1113 |                                                     |
| 86  | 1187 | 1189 | CH2 wagging                                         |
| 87  | 1191 | 1192 |                                                     |
| 88  | 1213 | 1210 |                                                     |
| 89  | 1214 | 1214 |                                                     |
| 90  | 1222 | 1218 | CH2 twist, C-H methine in-plane, in-plane in-phase  |
| 91  | 1240 | 1239 |                                                     |
| 92  | 1260 | 1261 |                                                     |
| 93  | 1261 | 1263 |                                                     |
| 94  | 1280 | 1281 |                                                     |
| 95  | 1284 | 1286 |                                                     |
| 96  | 1302 | 1296 |                                                     |
| 97  | 1305 | 1298 |                                                     |
| 98  | 1322 | 1330 |                                                     |
| 99  | 1327 | 1335 |                                                     |
| 100 | 1334 | 1338 | pyrrole stretching, CH2 - twisting and wagging      |
| 101 | 1347 | 1345 |                                                     |
| 102 | 1348 | 1350 |                                                     |
| 103 | 1359 | 1359 |                                                     |
| 104 | 1362 | 1361 |                                                     |
| 105 | 1365 | 1363 |                                                     |
| 106 | 1365 | 1369 |                                                     |
| 107 | 1382 | 1383 |                                                     |
| 108 | 1384 | 1383 | CH2 wagging                                         |
| 109 | 1408 | 1407 |                                                     |

|     |      |      |                                         |
|-----|------|------|-----------------------------------------|
| 110 | 1409 | 1409 |                                         |
| 111 | 1410 | 1410 | <hr/>                                   |
| 112 | 1413 | 1416 | CH2 wagging + ring stretching           |
| 113 | 1416 | 1420 | * Mn-Nypr (some)                        |
| 114 | 1421 | 1423 |                                         |
| 115 | 1453 | 1450 |                                         |
| 116 | 1458 | 1454 |                                         |
| 117 | 1460 | 1457 | <hr/>                                   |
| 118 | 1493 | 1494 |                                         |
| 119 | 1494 | 1495 | CH2 scissoring                          |
| 120 | 1498 | 1496 |                                         |
| 121 | 1500 | 1500 |                                         |
| 122 | 1502 | 1503 |                                         |
| 123 | 1506 | 1508 | <hr/>                                   |
| 124 | 1516 | 1511 |                                         |
| 125 | 1520 | 1521 | ring stretching, C-Nmethine stretching, |
| 126 | 1525 | 1537 | CH2                                     |
| 127 | 1596 | 1615 | pyrrole ring stretching                 |
| 128 | 1618 | 1621 |                                         |
| 129 | 1623 | 1629 | <hr/>                                   |
| 130 | 2964 | 2945 | C-H stretching                          |
| 131 | 2964 | 2962 |                                         |
| 132 | 2970 | 2965 |                                         |
| 133 | 3009 | 2984 |                                         |
| 134 | 3011 | 3009 |                                         |
| 135 | 3013 | 3013 |                                         |
| 136 | 3067 | 3058 |                                         |
| 137 | 3070 | 3067 |                                         |
| 138 | 3072 | 3076 |                                         |
| 139 | 3104 | 3081 |                                         |
| 140 | 3107 | 3084 |                                         |
| 141 | 3109 | 3109 |                                         |
| 142 | 3133 | 3111 |                                         |
| 143 | 3133 | 3126 |                                         |
| 144 | 3138 | 3134 |                                         |
| 145 | 3229 | 3222 |                                         |
| 146 | 3229 | 3228 |                                         |
| 147 | 3229 | 3232 |                                         |
| 148 | 3249 | 3236 |                                         |
| 149 | 3250 | 3248 |                                         |
| 150 | 3250 | 3253 |                                         |
| 151 | 3270 | 3259 |                                         |
| 152 | 3271 | 3271 |                                         |
| 153 | 3271 | 3275 |                                         |





0
