# Supplementary material for: Estimate of the vibrational contribution to the entropy change associated with the spin transition in the d4systems [MnIII(pyrol)3tren] and [CrII(depe)2I2]
Source: Royal Society of Chemistry journal article supplement (doi:10.1039/b616258d), 2007-01-01
Supplement: b616258d_esi_2.pdf [file b616258d_esi_2.pdf]

|    |        |    |                                          |        |
|----|--------|----|------------------------------------------|--------|
| 1  | 35.98  | HS | ethyl as whole                           | 35.98  |
| 2  | 45.17  |    | ts-                                      | 45.17  |
| 3  | 47.18  |    | ligands as whole                         | 47.18  |
| 4  | 51.05  |    | ts-                                      | 51.05  |
| 5  | 61.94  |    | ts-                                      | 61.94  |
| 6  | 66.61  |    | ethyl methyls                            | 66.61  |
| 7  | 70.93  |    | ethyl as whole                           | 70.93  |
| 8  | 71.55  |    | ethyl methyls                            | 71.55  |
| 9  | 76.79  |    | ethyl as whole + Cr-I bending            | 76.79  |
| 10 | 79.76  |    | ts-                                      | 79.76  |
| 11 | 84.22  |    | ethyl as whole                           | 84.22  |
| 12 | 86.43  |    | ts-                                      | 86.43  |
| 13 | 93.94  |    | ts-                                      | 93.94  |
| 14 | 94.06  |    | ethyls Cr-I stretching                   | 94.06  |
| 15 | 96.97  |    | ts-                                      | 96.97  |
| 16 | 99.74  |    | ethyls as whole                          | 99.74  |
| 17 | 101.70 |    | ethyls as whole                          | 101.70 |
| 18 | 105.53 |    | ts-                                      | 105.53 |
| 19 | 112.06 |    | ts-                                      | 112.06 |
| 20 | 117.53 |    | ts-                                      | 117.53 |
| 21 | 118.82 |    | ts-                                      | 118.82 |
| 22 | 120.64 |    | Cr-I stretch + Ethyls                    | 120.64 |
| 23 | 131.89 |    | Cr-I stretch + Ethyls                    | 131.89 |
| 24 | 144.06 |    | Cr-I stretch + Ethyls                    | 144.06 |
| 25 | 150.52 |    | ethyls as whole                          | 150.52 |
| 26 | 153.45 |    | ethyls as whole                          | 153.45 |
| 27 | 156.64 |    | ethyl torsion                            | 156.64 |
| 28 | 168.81 |    | ethyl + Cr-I stretching                  | 168.81 |
| 29 | 183.31 |    | Cr-I stretch + chelate libration         | 183.31 |
| 30 | 189.60 |    | ethyl torsion                            | 189.60 |
| 31 | 192.71 |    | ethyl Torsion Cr-I bending               | 192.71 |
| 32 | 196.43 |    | ethyl torsion                            | 196.43 |
| 33 | 203.72 |    | ethyl emtyhl vibr                        | 203.72 |
| 34 | 212.43 |    | ethyl + chelate ring                     | 212.43 |
| 35 | 214.45 |    | ethyl + chelate ring                     | 214.45 |
| 36 | 217.81 |    | ethyl + chelate ring                     | 217.81 |
| 37 | 231.19 |    | ethyl torsion                            | 231.19 |
| 38 | 235.31 |    | Cr-I bending + ethyl torsions            | 235.31 |
| 39 | 245.45 |    | ethyl torsion                            | 245.45 |
| 40 | 246.99 |    | Cr-I bending or Cr-Pstretching           | 246.99 |
| 41 | 261.32 |    | Cr-I bending or Cr-Pstretching           | 261.32 |
| 42 | 264.16 |    | Cr_I bending or Cr-P stretching          | 264.16 |
| 43 | 266.32 |    | Me rotation                              | 266.32 |
| 44 | 268.19 |    | Me rotation                              | 268.19 |
| 45 | 269.35 |    | Me rotation + some chelate ring CH2 swir | 269.35 |
| 46 | 275.32 |    | Me rotation + some chelate ring CH2 swir | 275.32 |
| 47 | 276.82 |    | Me rotation                              | 276.82 |
| 48 | 279.04 |    | Me rotation                              | 279.04 |
| 49 | 290.97 |    | Me rotation + some chelater ring CH2 swi | 290.97 |
| 50 | 297.33 |    | Me rotation + some chelater ring CH2 swi | 297.33 |
| 51 | 300.74 |    | Me rotation + some chelate ring CH2 swir | 300.74 |
| 52 | 314.14 |    | Me rotation + some chelate ring CH2 swir | 314.14 |
| 53 | 321.03 |    | Me rotation + some chelate ring CH2 swir | 321.03 |
| 54 | 337.95 |    | chelate CH2 swinging + Me rotation       | 337.95 |
| 55 | 352.05 |    | chelate CH2 swinging + Me rotation       | 352.05 |

|     |         |                                         |         |
|-----|---------|-----------------------------------------|---------|
| 56  | 373.41  | Chelate CH2 swinging + Me rotation+ C   | 373.41  |
| 57  | 401.50  | chelate CH2 swinging + Me rotation + C  | 401.50  |
| 58  | 422.09  | Cr-P stretching + Et swinging           | 422.09  |
| 59  | 432.23  | Cr-P stretching + Et swinging           | 432.23  |
| 60  | 445.01  | Cr-P stretching + Et swinging + CH2 ch  | 445.01  |
| 61  | 449.02  | Cr-P stretching + Et swinging + CH2 ch  | 449.02  |
| 62  | 558.18  | Cr-P stretching                         | 558.18  |
| 63  | 563.18  | Cr-P stretching                         | 563.18  |
| 64  | 569.54  | Cr-P stretching                         | 569.54  |
| 65  | 577.46  | Cr-P stretching                         | 577.46  |
| 66  | 623.86  | P-CH2(ethyl) stretching, P-Cr bending   | 623.86  |
| 67  | 627.76  | P-CH2(ethyl) stretching, P-Cr bending   | 627.76  |
| 68  | 632.17  | P-CH2(ethyl) stretching, P-Cr-P torsion | 632.17  |
| 69  | 633.76  | P-CH2(ethyl) stretching, P-Cr bending   | 633.76  |
| 70  | 638.85  | P-CH2(ethyl) stretching P-Cr bending    | 638.85  |
| 71  | 640.67  | P-CH2(ethyl) stretching P-Cr bending    | 640.67  |
| 72  | 650.90  | P-CH2(ethyl) stretching P-Cr torsion    | 650.90  |
| 73  | 655.28  | P-CH2(ethyl) stretching P-Cr bending    | 655.28  |
| 74  | 741.02  | CH2(ethyl) swinging                     | 741.02  |
| 75  | 742.75  | CH2(ethyl) swinging                     | 742.75  |
| 76  | 746.76  | CH2(ethyl) swinging                     | 746.76  |
| 77  | 757.64  | CH2(ethyl) swinging                     | 757.64  |
| 78  | 778.52  | CH2(ethyl) swinging                     | 778.52  |
| 79  | 781.67  | CH2(ethyl) swinging                     | 781.67  |
| 80  | 784.26  | CH2(ethyl) swinging                     | 784.26  |
| 81  | 791.83  | CH2(ethyl) swinging                     | 791.83  |
| 82  | 840.91  | CH2(chelate) sw in phase                | 840.91  |
| 83  | 844.39  | CH2(chelate) sw in phase                | 844.39  |
| 84  | 915.69  | CH2(chelate) sw out of phase            | 915.69  |
| 85  | 918.29  | CH2(chelate) sw out of phase            | 918.29  |
| 86  | 995.62  | ethyl C-C stretching                    | 995.62  |
| 87  | 995.89  | ethyl C-C stretching                    | 995.89  |
| 88  | 998.09  | ethyl C-C stretching                    | 998.09  |
| 89  | 998.35  | ethyl C-C stretching                    | 998.35  |
| 90  | 1000.98 | ethyl C-C stretching                    | 1000.98 |
| 91  | 1002.64 | ethyl C-C stretching                    | 1002.64 |
| 92  | 1003.08 | ethyl C-C stretching + P-C stretching   | 1003.08 |
| 93  | 1003.23 | ethyl C-C stretching + P-C stretching   | 1003.23 |
| 94  | 1011.69 | chelate C-C stretching                  | 1011.69 |
| 95  | 1012.32 | chelate C-C stretching                  | 1012.32 |
| 96  | 1022.54 | ethyl CH2 out-of-plane swinging         | 1022.54 |
| 97  | 1023.62 | ethyl CH2 out-of-plane swinging         | 1023.62 |
| 98  | 1029.29 | ethyl CH2 out-of-plane swinging         | 1029.29 |
| 99  | 1032.87 | ethyl CH2 out-of-plane swinging         | 1032.87 |
| 100 | 1045.85 | ethyl CH2 out-of-plane swinging         | 1045.85 |
| 101 | 1047.83 | ethyl C-C stretching                    | 1047.83 |
| 102 | 1051.02 | ethyl C-C stretching                    | 1051.02 |
| 103 | 1054.79 | ethyl C-C stretching                    | 1054.79 |
| 104 | 1056.76 | ethyl C-C stretching                    | 1056.76 |
| 105 | 1057.70 | ethyl C-C stretching                    | 1057.70 |
| 106 | 1058.62 | ethyl C-C stretching                    | 1058.62 |
| 107 | 1063.44 | ethyl C-C stretching                    | 1063.44 |
| 108 | 1069.39 | ethyl C-C stretching                    | 1069.39 |
| 109 | 1071.49 | ethyl C-C stretching + CH2 out-of-plane | 1071.49 |
| 110 | 1071.61 | ethyl C-C stretching + CH2 out-of-plane | 1071.61 |

|     |         |                                         |         |
|-----|---------|-----------------------------------------|---------|
| 111 | 1073.63 | ethyl C-C stretching + CH2 out-of-plane | 1073.63 |
| 112 | 1122.23 | ethyl CH2 out-of-plane swinging         | 1122.23 |
| 113 | 1125.57 | chelate CH2 out-of-plane swinging       | 1125.57 |
| 114 | 1156.68 | chelate CH2 out-of-plane swinging       | 1156.68 |
| 115 | 1158.91 | chelate CH2 out-of-plane swinging       | 1158.91 |
| 116 | 1270.21 | ethyl CH2 out-of-plane swinging         | 1270.21 |
| 117 | 1273.69 | ethyl CH2 out-of-plane swinging         | 1273.69 |
| 118 | 1275.19 | ethyl CH2 out-of-plane swinging         | 1275.19 |
| 119 | 1276.39 | ethyl CH2 out-of-plane swinging         | 1276.39 |
| 120 | 1276.51 | ethyl CH2 out-of-plane swinging         | 1276.51 |
| 121 | 1277.62 | ethyl CH2 out-of-plane swinging         | 1277.62 |
| 122 | 1281.01 | ethyl CH2 out-of-plane swinging         | 1281.01 |
| 123 | 1283.47 | ethyl CH2 out-of-plane swinging         | 1283.47 |
| 124 | 1284.45 | chelate CH2 out-of-plane swinging       | 1284.45 |
| 125 | 1286.30 | chelate CH2 out-of-plane swinging       | 1286.30 |
| 126 | 1292.57 | chelate and ethyl CH2 out-of-plane swir | 1292.57 |
| 127 | 1295.05 | chelate and ethyl CH2 out-of-plane swir | 1295.05 |
| 128 | 1302.25 | chelate and ethyl CH2 out-of-plane swir | 1302.25 |
| 129 | 1305.56 | chelate and ethyl CH2 out-of-plane swir | 1305.56 |
| 130 | 1308.82 | chelate and ethyl CH2 out-of-plane swir | 1308.82 |
| 131 | 1311.20 | chelate and ethyl CH2 out-of-plane swir | 1311.20 |
| 132 | 1313.96 | chelate and ethyl CH2 out-of-plane swir | 1313.96 |
| 133 | 1316.15 | chelate and ethyl CH2 out-of-plane swir | 1316.15 |
| 134 | 1319.61 | chelate and ethyl CH2 out-of-plane swir | 1319.61 |
| 135 | 1321.90 | chelate and ethyl CH2 out-of-plane swir | 1321.90 |
| 136 | 1426.98 | CH3-C bending                           | 1426.98 |
| 137 | 1427.58 | CH3-C bending                           | 1427.58 |
| 138 | 1427.93 | CH3-C bending                           | 1427.93 |
| 139 | 1429.03 | CH3-C bending                           | 1429.03 |
| 140 | 1431.15 | CH3-C bending                           | 1431.15 |
| 141 | 1431.85 | CH3-C bending                           | 1431.85 |
| 142 | 1432.65 | CH3-C bending                           | 1432.65 |
| 143 | 1433.64 | CH3-C bending                           | 1433.64 |
| 144 | 1476.52 | ethyl/chelate -CH2 $\delta$             | 1476.52 |
| 145 | 1477.84 | ethyl/chelate -CH2 $\delta$             | 1477.84 |
| 146 | 1481.42 | ethyl/chelate -CH2 $\delta$             | 1481.42 |
| 147 | 1484.01 | ethyl/chelate -CH2 $\delta$             | 1484.01 |
| 148 | 1484.32 | ethyl/chelate -CH2 $\delta$             | 1484.32 |
| 149 | 1484.83 | ethyl/chelate -CH2 $\delta$             | 1484.83 |
| 150 | 1486.73 | ethyl/chelate -CH2 $\delta$             | 1486.73 |
| 151 | 1489.67 | ethyl/chelate -CH2 $\delta$             | 1489.67 |
| 152 | 1491.17 | ethyl/chelate -CH2 $\delta$             | 1491.17 |
| 153 | 1493.98 | ethyl/chelate -CH2 $\delta$             | 1493.98 |
| 154 | 1498.57 | ethyl/chelate -CH2 $\delta$             | 1498.57 |
| 155 | 1500.30 | ethyl/chelate -CH2 $\delta$             | 1500.30 |
| 156 | 1512.31 | methyl $\delta$                         | 1512.31 |
| 157 | 1512.74 | methyl $\delta$                         | 1512.74 |
| 158 | 1512.91 | methyl $\delta$                         | 1512.91 |
| 159 | 1513.08 | methyl $\delta$                         | 1513.08 |
| 160 | 1513.97 | methyl $\delta$                         | 1513.97 |
| 161 | 1515.24 | methyl $\delta$                         | 1515.24 |
| 162 | 1515.27 | methyl $\delta$                         | 1515.27 |
| 163 | 1515.54 | methyl $\delta$                         | 1515.54 |
| 164 | 1518.01 | methyl $\delta$                         | 1518.01 |
| 165 | 1519.04 | methyl $\delta$                         | 1519.04 |

|     |         |                 |         |
|-----|---------|-----------------|---------|
| 166 | 1519.15 | methyl $\delta$ | 1519.15 |
| 167 | 1520.05 | methyl $\delta$ | 1520.05 |
| 168 | 1522.39 | methyl $\delta$ | 1522.39 |
| 169 | 1522.88 | methyl $\delta$ | 1522.88 |
| 170 | 1523.73 | methyl $\delta$ | 1523.73 |
| 171 | 1524.74 | methyl $\delta$ | 1524.74 |
| 172 | 3009.24 | CH stretching   | 3009.24 |
| 173 | 3009.54 | —               | 3009.54 |
| 174 | 3009.81 |                 | 3009.81 |
| 175 | 3010.35 |                 | 3010.35 |
| 176 | 3010.76 |                 | 3010.76 |
| 177 | 3012.91 |                 | 3012.91 |
| 178 | 3013.89 |                 | 3013.89 |
| 179 | 3014.13 |                 | 3014.13 |
| 180 | 3017.29 |                 | 3017.29 |
| 181 | 3022.16 |                 | 3022.16 |
| 182 | 3024.98 |                 | 3024.98 |
| 183 | 3027.53 |                 | 3027.53 |
| 184 | 3028.38 |                 | 3028.38 |
| 185 | 3029.35 |                 | 3029.35 |
| 186 | 3034.28 |                 | 3034.28 |
| 187 | 3035.91 |                 | 3035.91 |
| 188 | 3037.99 |                 | 3037.99 |
| 189 | 3038.14 |                 | 3038.14 |
| 190 | 3040.84 |                 | 3040.84 |
| 191 | 3048.43 |                 | 3048.43 |
| 192 | 3081.51 |                 | 3081.51 |
| 193 | 3081.86 |                 | 3081.86 |
| 194 | 3082.48 |                 | 3082.48 |
| 195 | 3082.70 |                 | 3082.70 |
| 196 | 3083.18 |                 | 3083.18 |
| 197 | 3084.77 |                 | 3084.77 |
| 198 | 3088.52 |                 | 3088.52 |
| 199 | 3089.82 |                 | 3089.82 |
| 200 | 3090.19 |                 | 3090.19 |
| 201 | 3091.15 |                 | 3091.15 |
| 202 | 3091.18 |                 | 3091.18 |
| 203 | 3091.78 |                 | 3091.78 |
| 204 | 3093.06 |                 | 3093.06 |
| 205 | 3093.70 |                 | 3093.70 |
| 206 | 3097.70 |                 | 3097.70 |
| 207 | 3100.33 |                 | 3100.33 |
| 208 | 3101.61 |                 | 3101.61 |
| 209 | 3103.60 |                 | 3103.60 |
| 210 | 3104.48 |                 | 3104.48 |
| 211 | 3108.20 |                 | 3108.20 |
| 212 | 3113.88 |                 | 3113.88 |
| 213 | 3115.05 |                 | 3115.05 |
| 214 | 3116.26 |                 | 3116.26 |
| 215 | 3117.69 |                 | 3117.69 |
| 216 | 3120.48 |                 | 3120.48 |
| 217 | 3123.42 |                 | 3123.42 |
| 218 | 3125.67 |                 | 3125.67 |
| 219 | 3129.05 | CH stretching   | 3129.05 |

LS ethyl/ethylene as whole  
ethyl/ethylene as whole  
ethyl as whole  
ethyl/ethylene as whole  
ethyl/ethylene as whole  
ethyl as whole  
ethyl as whole  
ethyl/molecule as whole  
ethyl as whole + Cr-I bending  
ethyl as whole  
ethyl as whole  
ethyl as whole + Cr-I stretching  
ethyl as whole  
ligand as whole + Cr-I bending  
ethyls rotation  
ethyls rotation  
ethyls rotation  
ethyl as whole  
ethyl as whole  
ethyl as whole  
ethyl rotation  
ligand as whole  
ligand as whole  
ethyl rotation  
ethyl rotation  
ligand as whole  
ligand as whole  
ligand as whole + symm. Cr-P stretching  
ligand as whole + symm. Cr-P stretching  
ligand as whole + asym. Cr-P stretching  
ligand as whole + asym. Cr-P stretch/bending  
ligand as whole + asym. Cr-P stretching  
Cr-I stretching  
ligand as whole  
ligand as whole + some Cr-I stretch and Cr-P bending  
ligand as whole + some Cr-I stretch and Cr-P bending  
Cr-stretching + chelate ring libration  
Cr-stretching + chelate ring libration  
Cr-P stretching or Cr-I bending  
Cr-I stretching  
Me rotation  
Me rotation  
Me rotation + chelate CH2 swinging  
Me rotation  
Cr-P stretching + Me rotation  
Me rotation + Cr-P stretching  
Me rotation  
Me rotation  
Me rotation  
Me rotation + chelate CH2 swinging  
Cr-P stretching + Me rotation  
Cr-P stretching + chelate libration  
Me rotation + CH2 chelate swinging  
CH2 chelate swinging + some Cr-P bending  
CH2 chelate swinging + some Cr-P bending

CH2 chelate swinging + Cr-P stretching  
CH2 chelate swinging + Cr-P stretching  
Cr-P stretching  
Cr-P stretching  
Cr-P stretching/chelate libration  
Cr-P stretching/chelate libration  
Cr-P stretching  
Cr-P stretching  
Cr-P stretching  
chelate libration + Cr-P stretching  
P-CH2 stretching, Cr-P bending  
CH2(ethyl) swinging

\_\_\_\_\_  
\_\_\_\_\_  
\_\_\_\_\_  
\_\_\_\_\_  
\_\_\_\_\_

CH2(ethyl) swinging  
CH2(chelate)swinging in phase  
CH2(chelate)swinging in phase  
CH2(chelate)swinging out of phase  
CH2(chelate)swinging out of phase  
ethyl C-C stretching

\_\_\_\_\_  
\_\_\_\_\_  
\_\_\_\_\_  
\_\_\_\_\_  
\_\_\_\_\_

ethyl C-C stretching + P-C stretching  
ethyl C-C stretching + P-C stretching  
chelate C-C stretching  
chelate C-C stretching  
ethyl CH2 out-of-plane swinging

\_\_\_\_\_  
\_\_\_\_\_  
\_\_\_\_\_  
\_\_\_\_\_

ethyl CH2 out of plane swinging  
ethyl C\_C stretching

\_\_\_\_\_  
\_\_\_\_\_  
\_\_\_\_\_  
\_\_\_\_\_

ethyl C-C stretching  
ethyl C-C stretching +CH2 out-of-plane swinging  
ethyl C-C stretching + CH2 out of plane swinging

ethyl C-C stretching + CH2 out of plane swinging  
chelate CH2 out-of-plane swinging  
chelate CH2 out-of-plane swinging  
chelate CH2 out-of-plane swinging  
chelate CH2 out-of-plane swinging  
ethyl CH2 out-of-plane swinging

\_\_\_\_\_

\_\_\_\_\_

\_\_\_\_\_

\_\_\_\_\_

\_\_\_\_\_ ethyl/chelate CH2-out-of-plane swinging

\_\_\_\_\_

\_\_\_\_\_

\_\_\_\_\_

\_\_\_\_\_

\_\_\_\_\_

\_\_\_\_\_

\_\_\_\_\_

\_\_\_\_\_

\_\_\_\_\_

\_\_\_\_\_

\_\_\_\_\_

\_\_\_\_\_

\_\_\_\_\_

CH3 bending

\_\_\_\_\_

\_\_\_\_\_

\_\_\_\_\_

\_\_\_\_\_

\_\_\_\_\_

CH3 bending

ethyl/chelate CH2  $\delta$

\_\_\_\_\_

\_\_\_\_\_

\_\_\_\_\_ -

\_\_\_\_\_

\_\_\_\_\_

\_\_\_\_\_

\_\_\_\_\_

\_\_\_\_\_

\_\_\_\_\_

ethyl/chelate CH2  $\delta$

methyl  $\delta$

methyl  $\delta$   
C-H stretching

\_\_\_\_\_

CH stretching
